# Supplementary material for: Multidrug-Resistant Pseudomonas aeruginosa Evokes Differential Inflammatory Responses in Human Microglial and Retinal Pigment Epithelial Cells
Source: MDPI journal article supplement (doi:10.3390/microorganisms8050735), 2020-05-14
Supplement: s1 [file s1]

# Supplementary Materials

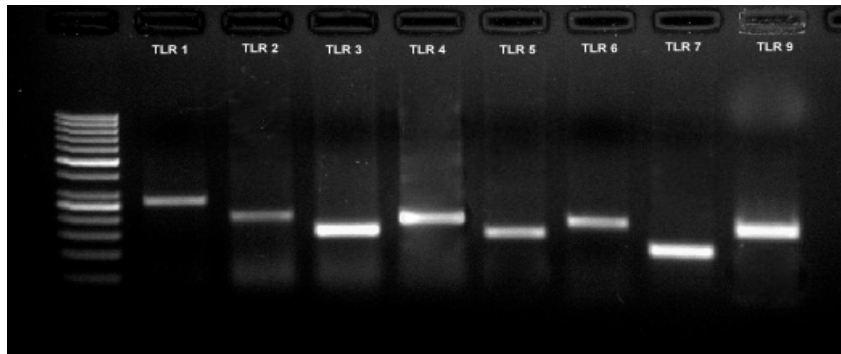

**Figure S1.** Expression of TLRs(TLR 1-7 and 9), following by RT-PCR on cultured human Microglia cell line.

**Table S1.** Clinical and Demographic details along with microbiological profile of the strains selected in the study.

| <i>Pseudomonas aeruginosa</i> | Age | Gender | Diagnosis                 | Microbial Culture             | Initial Visual acuity | Final Visual acuity | Antibiotic susceptibility profile with Minimum Inhibitory Concentration (ug/ml) |                 |              |                 |                   |              |               |        |                  | Green Pigmentation | $\beta$ -hemolysis | Metallic sheen |
|-------------------------------|-----|--------|---------------------------|-------------------------------|-----------------------|---------------------|---------------------------------------------------------------------------------|-----------------|--------------|-----------------|-------------------|--------------|---------------|--------|------------------|--------------------|--------------------|----------------|
|                               |     |        |                           |                               |                       |                     | CIP                                                                             | GEN             | OF           | AK              | MO                | GAT          | CAZ           | IMP    | PIT              |                    |                    |                |
| <i>S-PA</i>                   | 63  | M      | Endogenous                | <i>Pseudomonas aeruginosa</i> | HM+                   | CF 1cm              | S ( $\leq 0.25$ )                                                               | S ( $\leq 1$ )  | S (0.75)     | S ( $\leq 2$ )  | S ( $\leq 0.25$ ) | S (=2)       | S (=3)        | S (=2) | S (=8)           |                    |                    |                |
| <i>MDR-PA</i>                 | 40  | F      | Post-operative (Cataract) | <i>Pseudomonas aeruginosa</i> | HM+                   | HM+                 | R ( $\geq 4$ )                                                                  | R ( $\geq 16$ ) | R ( $> 32$ ) | R ( $\geq 64$ ) | R (= 8)           | R ( $> 32$ ) | R ( $> 256$ ) | R (=8) | R ( $\geq 128$ ) |                    |                    |                |

*S-PA*: *Pseudomonas aeruginosa* susceptible strain; *MDR-PA* *Pseudomonas aeruginosa* resistant strain M: male; F: female, HM+: Hand movement, CF 1cm: Counting finger from 1cm distance, CIP: Ciprofloxacin, GEN: Gentamycin, OF: Ofloxacin, AK: Amikacin, MO: Moxifloxacin, GAT: Gatifloxacin, CAZ: Ceftazidime, IMP: Imipenem, PIT: Piperacillin-tazobactam.
